# Supplementary material for: Utility of Serum Albumin for Predicting Incident Metabolic Syndrome According to Hyperuricemia
Source: PubMed Central journal article supplement — Diabetes Metab J. 2018 Sep 28;42(6):529–37. doi: 10.4093/dmj.2018.0012 (PMC6300434; doi:10.4093/dmj.2018.0012), 2018-09-28
Supplement: dmj-42-529-s001.pdf [file dmj-42-529-s001.pdf]

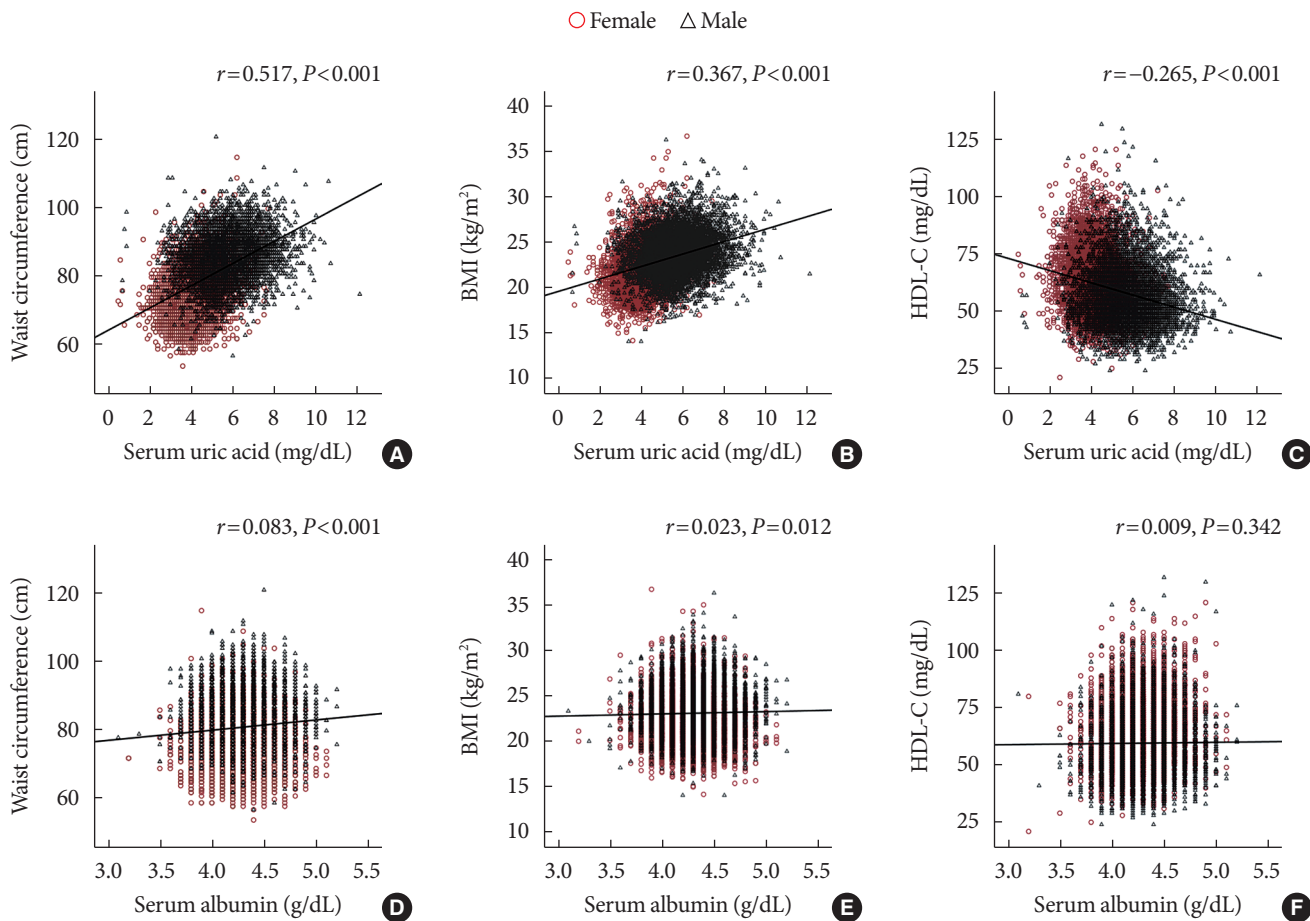

**Supplementary Fig. 1.** Correlations between baseline serum albumin or serum uric acid and other parameters. (A) Correlation between baseline serum uric acid and waist circumference. (B) Correlation between baseline serum uric acid and body mass index (BMI). (C) Correlation between baseline serum uric acid and high density lipoprotein cholesterol (HDL-C). (D) Correlation between baseline serum albumin and waist circumference. (E) Correlation between baseline serum albumin and BMI. (F) Correlation between baseline serum albumin and HDL-C.
